# Supplementary material for: New approaches to modelling of local seismic amplification susceptibility using direct characteristics of influencing criteria: case study of Bam City, Iran
Source: Copernicus journal article supplement (doi:10.5194/nhess-19-1989-2019), 2019-09-11
Supplement: Supplementary file 1 [file nhess-19-1989-2019-supplement.zip]

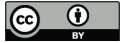

## *Supplement of*

# **New approaches to modelling of local seismic amplification susceptibility using direct characteristics of influencing criteria: case study of Bam City, Iran**

**Reza Hassanzadeh et al.**

*Correspondence to:* Reza Hassanzadeh (hassanzadeh22@yahoo.com, r.hassanzadeh@kgut.ac.ir)

- nhess-19-1989-2019-supplement-title-page.pdf
- Larzesh Model Data
  - Alluvial Thickness.tfw
  - Alluvial Thickness.tif
  - Alluvial Thickness.tif.aux.xml
  - Alluvial Thickness.tif.ovr
  - Consolidation of soil.tfw
  - Consolidation of soil.tif
  - Consolidation of soil.tif.aux.xml
  - Consolidation of soil.tif.ovr
  - Distribution of Grain Size at 1m.tfw
  - Distribution of Grain Size at 1m.tif
  - Distribution of Grain Size at 1m.tif.aux.xml
  - Distribution of Grain Size at 1m.tif.ovr
  - Distribution of Grain Size at 9m.tfw
  - Distribution of Grain Size at 9m.tif
  - Distribution of Grain Size at 9m.tif.aux.xml
  - Distribution of Grain Size at 9m.tif.ovr
  - Extent\_of\_Bam\_city.dbf
  - Extent\_of\_Bam\_city.prj
  - Extent\_of\_Bam\_city.sbn
  - Extent\_of\_Bam\_city.sbx
  - Extent\_of\_Bam\_city.shp

- Extent\_of\_Bam\_city.shp.xml
- Extent\_of\_Bam\_city.shx
- Groundwater Level1.tfw
- Groundwater Level1.tif
- Groundwater Level1.tif.aux.xml
- Groundwater Level1.tif.ovr
- P\_F\_Askari\_data.dbf
- P\_F\_Askari\_data.prj
- P\_F\_Askari\_data.sbn
- P\_F\_Askari\_data.sbx
- P\_F\_Askari\_data.shp
- P\_F\_Askari\_data.shx
- P\_F\_Lashkaripour\_data.dbf
- P\_F\_Lashkaripour\_data.prj
- P\_F\_Lashkaripour\_data.sbn
- P\_F\_Lashkaripour\_data.sbx
- P\_F\_Lashkaripour\_data.shp
- P\_F\_Lashkaripour\_data.shp.xml
- P\_F\_Lashkaripour\_data.shx
- Street\_of\_Bam\_city.dbf
- Street\_of\_Bam\_city.prj
- Street\_of\_Bam\_city.sbn
- Street\_of\_Bam\_city.sbx
- Street\_of\_Bam\_city.shp
- Street\_of\_Bam\_city.shp.xml
- Street\_of\_Bam\_city.shx

The copyright of individual parts of the supplement might differ from the CC BY 4.0 License.
